# Supplementary material
Source: PubMed Central journal article supplement (PMC3365168)
Supplement: 1200782109_pnas.201200782SI.pdf [file 1200782109_pnas.201200782SI.pdf]

# Supporting Information

Rodriguez-Romaguera et al. 10.1073/pnas.1200782109

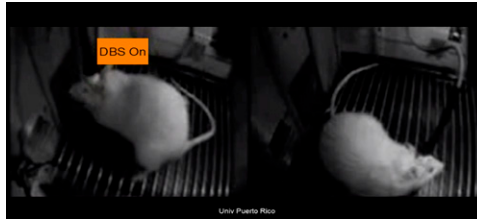

**Movie S1.** Deep brain stimulation (DBS) reduces conditioned freezing. Rats trained to press a bar for food are shown freezing. Initiation of DBS (indicated by the appearance of "DBS On" label) in the left-hand rat eliminated freezing, permitting a return to pressing. The right-hand rat was not stimulated.

[Movie S1](#)

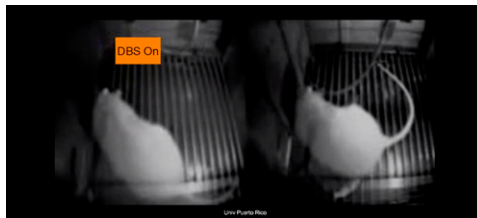

**Movie S2.** DBS does not affect spontaneous behaviors. Rats trained to press a bar for food are shown. Initiation of DBS (indicated by the appearance of "DBS On" label) in the left-hand rat neither induced convulsive behaviors nor altered locomotion and the rate of pressing for food. The right-hand rat was not stimulated.

[Movie S2](#)
